# Supplementary material for: MALDI Mass Spectrometry Imaging of Lipids and Gene Expression Reveals Differences in Fatty Acid Metabolism between Follicular Compartments in Porcine Ovaries
Source: Biology (Basel). 2015 Mar 6;4(1):216–36. doi: 10.3390/biology4010216 (PMC4381227; doi:10.3390/biology4010216)
Supplement: Supplementary File 1 [file biology-04-00216-s001.xlsx]

## Sheet: MSI_SsOvary_isotopic Positive
Positive ion mode. Normalized values of m/z peak heights (Progenesis MALDI)
m/z	Theca (Mean)	Theca (SD)	Granulosa cells (Mean)	Granulosa cells (SD)	OCC (Mean)	OCC (SD)	Follicular fluid (Mean)	Follicular fluid (SD)	ANOVA p-value	Max Fold Change
294.672	2.04583	0.676974	2.1048	1.54754	2.69082	1.09905	8.03973	5.68532	3.62066e-08	3.92981
335.656	1.72919	0.450103	1.70734	0.548707	2.21846	0.657683	5.94282	3.90642	1.76656e-08	3.48075
379.614	2.22449	0.906025	8.09645	11.8827	4.36238	4.99263	79.2312	74.3403	4.27436e-13	35.6176
380.6	1.55412	0.621152	1.83697	1.19701	1.5979	0.70974	8.27127	6.94094	2.21318e-09	5.32216
387.587	1.25854	0.593572	0.913603	0.40704	1.16007	0.419532	1.4608	0.626453	0.0622934	1.59894
393.267	0.952221	0.420496	0.713339	0.217626	0.931347	0.460219	0.678081	0.507065	0.167909	1.40429
401.581	2.16798	0.765701	1.89224	1.24949	2.40422	0.839706	10.4353	3.69165	3.33067e-16	5.51479
417.55	2.74409	1.02168	2.373	1.50742	3.0238	1.07566	7.57657	3.33606	5.2722e-08	3.19282
441.468	2.86542	0.998041	3.16448	2.91508	4.63832	2.13909	43.6817	41.3898	1.14464e-13	15.2444
445.49	2.71677	0.771875	2.55431	3.08986	4.54927	2.88053	11.4069	6.8866	1.96253e-07	4.46575
461.46	3.88977	2.01369	4.29626	7.63651	9.11284	6.30318	20.4928	13.3802	6.15076e-07	5.2684
470.383	4.65517	1.73321	4.50745	2.15405	5.30871	2.63107	12.6285	3.92837	1.55854e-07	2.80169
477.429	2.65507	1.10133	2.76139	4.7896	5.28058	4.70573	11.6242	6.97642	1.27075e-06	4.37812
478.77	4.28361	1.22071	5.81696	2.82258	3.80956	1.20172	3.83027	0.975152	0.0799165	1.52694
481.403	2.82809	0.841096	2.10164	0.456825	5.3401	7.41251	2.7756	0.757789	0.0238921	2.54091
495.592	1.97867	0.500525	1.66765	0.397812	3.877	3.48782	2.15694	0.562381	0.00205039	2.32482
518.705	4.70058	1.34314	3.62277	1.02044	6.30174	3.06411	14.2463	4.1943	1.91369e-11	3.93244
534.674	3.78576	0.896654	2.88848	1.12192	5.15402	2.19992	9.92881	3.53508	1.09979e-10	3.43738
566.467	9.82981	2.01667	9.37902	1.79636	5.55748	2.56258	12.6501	3.33703	3.05926e-08	2.27623
578.706	32.8092	9.30231	43.773	11.728	10.99	5.95722	49.8011	17.4134	5.1521e-12	4.53148
587.824	4.75697	1.18764	4.01297	0.445767	9.83503	11.2198	3.44417	0.565937	0.00349323	2.85556
592.53	10.8418	5.11563	18.597	6.87377	6.66911	3.16525	8.1221	1.73714	2.67851e-07	2.78852
600.502	3.98493	0.562011	3.48278	0.69733	6.33249	4.78809	3.61464	0.665743	0.0146485	1.81823
606.524	10.8584	2.9493	11.4907	2.38436	6.09928	2.01876	9.92047	1.40314	2.98775e-07	1.88394
609.401	12.5411	4.60687	24.6757	7.80901	7.81538	3.33237	10.4473	2.63899	3.28694e-09	3.15733
618.3	12.7243	2.9962	25.4975	6.84653	11.7077	6.71868	12.8844	3.83483	3.88399e-05	2.17783
623.176	5.55729	1.16387	6.5967	1.08143	4.56037	0.944277	5.33024	0.876028	0.000440169	1.44653
624.371	6.04783	1.74222	5.77606	1.7843	10.4138	6.14299	5.8284	1.49643	0.00649317	1.80292
633.318	6.70641	2.35571	7.32843	1.70377	5.44588	2.14497	4.85096	1.45114	0.010814	1.51072
634.367	9.6473	2.86758	8.72778	2.91948	5.71125	2.87913	6.63419	2.03135	0.00182013	1.68918
635.366	33.9382	8.93502	65.1865	18.8194	27.3505	19.6529	29.8114	7.32244	2.77569e-05	2.38338
640.462	4.87488	0.631991	5.60612	1.16833	17.3119	16.7256	4.33091	1.13449	6.15293e-05	3.99729
650.165	7.52405	1.88774	6.72759	1.34164	5.39235	0.842356	5.58954	1.01539	0.000482895	1.39532
656.334	9.3587	4.78636	11.6853	5.96556	13.2316	7.8947	14.9132	7.83492	0.422341	1.59352
660.161	7.8019	1.48221	7.67682	1.3837	9.14924	6.81081	4.34341	1.27832	9.79475e-05	2.10646
662.234	16.7677	5.73585	15.9891	3.03759	9.14389	2.88559	7.88889	1.46673	9.5037e-10	2.12548
672.279	9.79439	5.16191	10.3976	18.117	24.2233	23.7047	32.3763	16.7214	0.000312116	3.30559
675.35	7.7952	1.65276	5.85786	1.44765	10.2287	13.9133	5.08968	1.1238	0.0712834	2.0097
677.033	68.0707	26.6253	77.7643	24.4634	25.2253	15.4475	127.972	52.3814	2.58925e-09	5.07314
679.885	7.766	1.9449	7.81387	1.31547	16.4578	20.3124	7.26332	1.66932	0.133841	2.26588
685.103	9.52362	3.7791	7.03491	1.27701	7.50917	2.05459	4.5382	0.931685	3.67915e-07	2.09854
688.248	17.3549	7.3451	16.8022	5.83426	14.6526	8.8038	20.52	9.58305	0.169636	1.40043
690.564	15.8555	7.21519	14.9886	2.93311	11.4506	7.70465	8.90213	2.51402	0.00189233	1.78109
692.978	13.9837	4.95264	15.9317	4.63807	8.84529	2.49695	30.0096	16.5625	4.02044e-07	3.39272
694.952	6.62365	1.53151	5.98787	1.29683	7.39146	2.30007	9.24547	3.17101	0.00479452	1.54403
696.903	4.99338	0.736296	6.12661	3.66948	5.13713	1.44096	4.67848	1.00819	0.424417	1.30953
704.997	15.079	2.41663	13.1053	2.11448	7.51666	2.51068	17.4873	4.62512	7.76537e-11	2.32647
707.972	15.9995	5.14315	24.4379	10.7745	11.808	4.50495	17.4132	3.47277	0.000132196	2.06961
709.483	8.40914	2.70407	9.89362	2.82399	8.71352	4.05431	8.75199	2.79575	0.558381	1.17653
720.918	6.44624	1.00599	6.56855	1.6738	4.61092	1.62835	7.44574	2.47032	0.00150374	1.6148
721.893	6.89344	1.44753	8.02162	2.10612	7.00919	1.52876	7.63677	1.91071	0.39119	1.16366
723.892	11.9503	3.89613	18.6903	4.92229	13.5335	5.33001	13.3791	3.76486	0.00647954	1.564
725.769	23.532	9.91911	26.9363	6.99396	17.7485	4.96604	78.4657	36.3955	1.55076e-12	4.42096
731.889	5.94317	1.10274	6.54675	1.31948	5.5854	2.22559	5.00373	1.37317	0.0615887	1.30837
732.962	15.8731	6.19416	13.42	3.32237	6.65215	1.99171	13.7489	4.83604	5.56851e-08	2.38616
733.937	28.8623	8.08946	49.7912	13.4031	27.4543	17.2017	35.8053	7.60352	0.000769203	1.8136
734.839	19.3554	5.48157	60.4597	28.8332	28.8538	12.9134	32.9526	9.54907	3.71107e-07	3.12366
741.763	10.7167	3.11245	11.1194	3.37182	10.1321	3.86185	37.2854	15.6439	2.20268e-12	3.67993
749.857	19.9842	6.43392	39.809	6.24295	36.101	12.0187	31.0298	8.43532	8.65844e-07	1.99202
751.857	9.02328	1.30034	9.70492	2.11723	8.98266	2.39027	11.5582	4.08615	0.0981328	1.28672
754.758	37.5956	14.8922	61.4507	14.3793	41.8523	15.3256	51.3443	12.5123	0.000504835	1.63452
756.684	37.5956	14.8922	61.4507	14.3793	41.8523	15.3256	51.3443	12.5123	0.000504835	1.63452
760.804	27.4121	7.88467	55.8544	20.076	34.6156	20.4986	57.7621	11.395	5.41132e-06	2.10717
772.702	20.1586	7.51652	33.6968	11.8833	29.816	13.7411	34.8389	9.71399	0.00427558	1.72824
780.723	11.2496	3.21158	12.0532	3.06698	14.1001	3.84542	10.4861	2.07868	0.0683116	1.34465
782.747	60.9808	26.8836	106.494	25.2224	121.201	46.8237	120.589	41.5041	2.99746e-05	1.98753
784.746	18.7829	8.14701	22.4969	5.73714	20.1122	9.80737	19.8328	8.87473	0.498764	1.19773
786.892	15.596	5.43373	17.7684	4.3765	13.0046	3.34206	14.0331	3.38835	0.0454461	1.36632
788.891	19.7231	7.67795	19.1882	3.10788	10.095	2.31071	11.9789	3.81687	4.93303e-07	1.95375
798.716	30.2439	9.7691	55.4105	19.1983	72.6836	37.1107	74.751	23.9063	5.60501e-06	2.47161
800.715	10.3166	2.55486	13.8414	5.03318	15.9208	6.55876	12.1521	3.15689	0.0400231	1.54322
806.713	7.54531	2.43939	6.57237	1.17019	9.58921	3.60098	6.19463	1.79768	0.00986799	1.54799
808.761	10.948	2.11129	10.7221	3.02604	11.3399	4.03782	9.23235	2.24089	0.376647	1.22828
810.785	10.6609	2.77995	11.1715	3.69839	9.38041	2.12305	9.62543	2.35593	0.477556	1.19094
820.415	6.90464	1.18425	7.9828	1.56147	13.5447	6.50109	6.43375	1.05443	4.95001e-07	2.10525
824.706	8.37083	1.75113	7.62054	1.47399	10.6792	2.94162	7.12086	1.40503	0.000792397	1.4997
835.799	7.8422	2.45983	6.58784	1.49129	5.51045	1.56734	6.98448	1.79916	0.0251192	1.42315
837.823	6.9925	0.958646	6.56226	0.953064	5.47199	1.32692	6.59281	0.621289	0.00125632	1.27787
856.059	5.1076	0.696193	4.28644	0.40395	6.16342	2.34094	4.06698	1.16205	0.000257872	1.51548

## Sheet: MSI_SsOvary_isotopic Negative
Negative ion mode. Normalized values of m/z peak heights (Progenesis MALDI)
m/z	Theca (Mean)	Theca (SD)	Granulosa (Mean)	Granulosa (SD)	OCC (Mean)	OCC (SD)	Follicular Fluid (Mean)	Follicular Fluid (SD)	ANOVA p-value	Max Fold Change
434.059	3.02234	0.557935	3.01603	0.61828	4.90577	4.13723	13.5774	8.77403	1.8e-09	4.50175
438.367	4.49461	2.2116	7.91521	3.73474	3.73989	1.04151	19.4779	8.85495	4.7e-12	5.20816
459.909	4.51353	1.85268	5.06435	1.48323	3.70284	1.19482	10.4252	2.99074	1.6e-09	2.81546
515.485	4.93803	1.09555	4.59126	1.15329	5.07414	1.22187	4.72339	1.63666	0.681835	1.10518
537.985	26.8029	40.6108	4.07672	0.992976	369.909	242.6	4.57553	0.703484	0	90.7369
539.284	20.6398	32.9759	22.7246	38.7362	24.9752	17.5781	4.83999	0.993821	0.0101516	5.16018
575.051	4.82155	1.97558	5.87401	2.68836	5.61256	0.990147	9.1243	4.3109	0.00508371	1.8924
575.552	7.13349	1.90727	6.80187	2.96174	10.373	3.49359	7.91465	3.87881	0.030513	1.52502
585.035	4.42262	0.911971	4.20036	0.616182	5.13352	1.49172	6.87911	2.09589	8.99e-05	1.63774
586.585	18.0612	19.3861	6.87996	10.7685	69.6629	23.9059	4.4668	0.89051	2.25e-13	15.5957
587.976	14.1667	12.6122	28.2775	18.4989	21.7794	5.94461	71.9734	33.5577	5.6e-07	5.08046
588.477	12.7579	14.3504	21.3844	10.2341	11.6553	3.32402	77.3264	37.0496	2.33e-11	6.63446
602.725	9.0786	8.58227	3.86624	0.913818	34.2964	11.485	3.44521	0.754777	2e-15	9.9548
603.34	5.94304	6.91504	5.15084	5.63706	5.1644	2.31732	3.72507	1.22937	0.506276	1.59541
615.308	8.41629	4.41445	4.27871	1.39477	7.74829	3.93333	4.01933	1.20587	0.000623667	2.09395
641.022	3.90133	1.14912	3.59079	0.843716	8.61051	3.60518	3.70271	0.993135	2.94e-08	2.39795
641.888	13.2462	8.99407	6.15741	6.25561	7.96074	4.19863	18.7344	5.82267	4.14e-05	3.04258
663.293	4.9939	2.05254	3.91354	0.757068	15.5215	7.38388	4.32409	1.43123	3.55e-11	3.9661
675.352	5.37723	1.24407	4.82616	1.97807	9.1474	4.48095	3.6842	1.1214	1.81e-06	2.48287
376.089	2.84572	0.394747	2.58834	0.544656	3.54902	0.57328	6.27271	3.00557	3.06e-09	2.42345
395.534	3.54575	1.17876	4.76704	1.57114	3.51427	0.512462	7.09773	1.99769	1.4e-07	2.01969
885.46	223.587	55.2231	261.444	90.5796	76.2501	29.5072	22.6295	11.2761	0	11.5533
887.466	52.2715	15.5659	119.099	51.4027	41.4268	13.9876	16.7202	6.65753	4.34e-14	7.12307
523.92	5.81283	1.11096	5.52023	0.985602	7.91081	1.73666	44.8841	17.8095	0	8.13084
527.818	5.71619	1.82329	5.42695	1.23505	6.56033	0.922917	12.2573	4.37307	4.72e-09	2.25859
521.823	5.9351	1.63965	4.80534	1.05216	13.9893	6.76289	9.42406	4.96921	3.32e-07	2.9112
545.918	5.16597	0.900581	5.30435	1.15614	5.90793	1.46465	11.8148	4.06147	8.22e-10	2.28705
549.907	7.64142	5.37853	5.82477	4.4495	20.0685	6.65939	7.73871	2.63027	5.58e-08	3.44537
551.731	8.19516	3.96726	9.85269	3.63616	10.6161	4.46085	19.7943	9.64805	0.000167251	2.41537
556.199	4.26809	0.571024	4.01959	0.641857	8.96315	2.82276	5.11735	0.98077	1.01e-11	2.22987
435.016	8.82856	4.17852	6.22827	3.79874	19.0322	7.0757	3.78866	0.593063	8.28e-10	5.02347
439.576	5.56428	4.99709	4.04497	0.847878	4.19923	0.622649	5.76267	1.60651	0.0613868	1.42465
442.288	4.33299	1.25704	4.00291	0.489601	4.19896	1.01136	4.52121	1.11041	0.740528	1.12948
448.147	3.75622	0.508979	3.95508	0.433709	4.33454	0.676767	11.2179	4.52183	1.23e-14	2.98649
460.912	7.33346	2.22721	6.82788	3.35624	13.414	4.94045	5.15847	0.8761	2.44e-06	2.60038
463.876	5.3264	2.28754	5.96441	1.38841	4.70852	0.853487	15.7385	5.79057	2.14e-12	3.34255
467.227	4.65081	0.874457	4.66	1.31944	8.95384	2.4789	4.08368	1.01161	1.49e-09	2.19259
470.122	5.18446	0.893147	5.74115	1.35772	6.56004	1.20293	15.0486	4.44127	2.66e-14	2.90264
472.812	4.81011	0.92063	5.12215	1.09048	5.91522	1.05887	7.0847	1.5757	0.00018708	1.47288
479.126	5.7309	1.65119	5.5746	1.767	8.95641	2.08919	5.34371	1.48229	2.8e-05	1.67606
481.862	5.41081	1.57346	5.52609	0.775691	5.73497	1.09924	10.0243	3.31766	1.85e-06	1.85264
495.334	8.07007	2.32732	7.63548	2.288	12.5345	3.23062	9.80725	2.92912	0.000451798	1.64162
503.768	4.73693	0.643861	4.96956	1.13328	11.8926	3.72981	6.91913	1.12362	2.05e-13	2.51061
505.843	7.34962	2.07997	7.736	2.11569	12.4184	4.26059	49.3214	25.3677	4.44e-16	6.71074
512.887	6.0703	2.29961	5.25012	0.834073	7.28347	1.54805	10.88	6.0065	0.000423981	2.07232
516.602	5.55993	1.80348	5.8163	0.909878	6.38351	0.91775	7.62078	2.4179	0.019196	1.37066
535.819	4.20115	0.8665	4.17903	0.766491	5.57088	1.05169	5.77849	1.73418	0.00114282	1.38274
539.9	24.3442	22.8344	40.2398	39.3592	11.5624	3.7757	1431.56	533.379	0	123.811
553.737	5.64047	1.60965	5.10093	0.922276	4.5216	0.62592	8.07544	2.35393	1.74e-06	1.78597
557.931	5.0302	0.885305	4.6634	0.882032	11.5108	4.56368	20.8874	7.30781	1.55e-15	4.47901
560.211	4.52536	1.0049	4.45707	0.906811	11.0959	2.76531	10.611	4.21208	5.66e-11	2.4895
561.898	5.16834	0.803445	5.47639	0.944004	5.50903	1.18881	22.5919	4.66896	0	4.37121
567.71	5.61334	1.41955	5.47263	0.969861	5.16305	0.82319	6.86805	1.63128	0.0156227	1.33023
577.057	6.34979	1.70108	8.91328	3.78471	6.02083	0.755217	12.5159	3.41129	7.84e-07	2.07876
589.526	7.79854	4.44597	7.52072	1.85308	5.03737	0.797796	13.9785	6.54121	6.89e-06	2.77496
598.074	20.5851	8.28024	30.0893	10.951	9.9003	3.3502	10.5223	3.36449	2.39e-09	3.03923
600.628	4.9599	1.41506	7.17926	2.10776	4.99671	1.0553	5.1737	0.707434	0.000589068	1.44746
603.956	15.6757	8.57218	19.1795	9.13047	20.7656	8.04527	31.6752	12.7875	0.00410405	2.02066
605.962	9.7778	4.73176	12.4411	5.90641	12.167	3.62502	41.8203	10.6743	1.44e-11	4.27707
609.951	7.0966	2.46203	7.44969	2.33716	8.08526	2.85387	19.8423	7.00031	3.78e-09	2.79602
616.379	9.79523	3.27071	11.3169	3.86767	7.8127	2.04964	5.87544	1.36677	1.34e-05	1.92613
619.89	6.11589	2.48115	6.03858	2.10081	4.84574	0.66432	28.4074	16.3782	2.89e-15	5.86235
627.937	4.98151	0.743284	5.38051	1.00286	7.3994	1.89115	9.32608	1.43305	4.92e-10	1.87214
631.949	5.97772	1.69994	6.27029	1.54275	6.59204	0.996811	10.1389	4.1797	0.00140863	1.69611
642.389	13.1591	4.44457	21.3792	6.92471	6.63882	2.37092	19.1874	5.486	9.35e-11	3.22032
657.845	5.46377	0.791293	4.98785	0.781009	5.3356	0.741239	10.3925	2.98451	8.71e-12	2.08357
663.977	5.95931	1.15559	6.22941	1.2119	6.12343	1.39215	44.5385	32.0225	0	7.47376
675.967	5.9771	1.07603	5.70626	0.907787	5.49196	0.536699	27.1675	13.2237	0	4.94677
689.941	5.55002	1.10737	5.79581	0.957076	5.41469	0.650943	7.03387	2.06518	0.00871244	1.29903
699.288	12.5044	2.59074	13.2654	4.07088	7.32493	3.32364	4.89105	0.681628	2.31e-11	2.71218
701.339	14.6949	3.35892	14.8577	4.04255	7.42053	1.87238	5.57374	1.82802	1.85e-13	2.66566
713.877	6.91653	1.84366	6.96215	1.65048	11.681	4.41549	9.98875	3.26197	0.000719662	1.68885
717.319	9.44938	2.095	10.1324	1.83294	5.77668	0.972908	5.49463	0.944869	6.94e-12	1.84406
726.825	11.0212	1.91881	11.5915	3.4454	5.69125	1.21567	6.70839	4.13244	2.3e-07	2.03672
728.99	7.72573	1.29618	7.96162	2.47081	9.51422	5.45326	38.2501	16.1782	1.42e-13	4.951
743.397	8.4561	2.31706	8.80179	2.33738	5.46771	1.17292	5.3053	1.60339	8.98e-07	1.65906
752.424	6.57356	1.78188	7.93912	2.25805	5.10081	1.02975	4.63363	1.15924	2.6e-05	1.71337
754.43	9.15238	3.54423	8.50978	3.01873	6.56768	1.50334	4.09692	0.84087	7.03e-08	2.23397
765.965	5.26944	1.0448	5.59061	1.05858	5.23375	0.781488	6.92315	1.9083	0.00853718	1.32279
778.366	13.2856	4.9949	11.8768	3.59188	6.25636	1.83667	4.58012	1.00987	5.6e-12	2.90071
787.94	6.27292	1.51118	6.20847	1.10749	5.17385	0.405512	5.47063	1.80418	0.109745	1.21243
794.369	12.7844	5.27152	10.926	4.00809	6.23126	2.48143	4.5789	1.09295	1.22e-08	2.79201
808.023	5.15833	1.42699	5.9957	1.50943	7.47649	4.2164	6.19199	1.63041	0.174214	1.4494
810.417	18.5236	6.38578	19.6066	6.69146	9.53073	3.24956	6.90174	2.03709	4.12e-10	2.84081
835.424	6.81681	1.17573	8.4801	1.86131	7.0344	1.92123	4.80468	0.829065	4.33e-06	1.76497
859.451	7.52912	1.58745	13.125	2.79209	6.52855	1.76077	4.38939	0.66152	9.21e-15	2.99017
861.456	15.9481	6.19194	24.2528	8.69963	8.07993	2.50755	6.44424	3.36121	1.05e-10	3.76348
863.485	11.0957	4.36333	13.3632	4.30236	7.2018	2.51438	5.06513	1.62041	3.7e-08	2.63828
883.454	23.9196	7.54138	26.1794	9.49444	11.5429	3.13449	4.25216	1.26565	0	6.15672
886.372	83.4571	19.2231	89.7987	27.0637	29.592	11.0305	11.0055	5.6767	0	8.15942
890.521	11.4527	3.09203	8.45414	2.00372	5.73131	1.70357	4.38036	1.01175	4.45e-11	2.61454
933.445	6.27	1.05819	9.25216	2.74591	5.09787	0.605416	4.40383	1.08212	5.28e-09	2.10094

## Sheet: Tentative annotation mz peaks
Tentative annotatation of m/z peaks detected by MALDI-MSI in positive and negative mode (CHCA matrix)
m/z Pos	Predicted molecular formula	Tentative attribution	Reference	Exact mass	Delta theo-obs Da	mass accuracy error %
723.892	C39H77N2O6PNa	SM (d18:1/16:1) [M+Na]+	Rocha et al, 2014	723.541	-0.351051	-0.0485184
723.892		PC(34 : 1) [M+Na]+ and loss of N(CH3)3	Tata et al, 2013	723.5	-0.392151	-0.0542019
725.769	C39h79N2O6PNa	SM (d18:1/16:0) [M+Na]+	Rocha et al, 2014	725.557	-0.21267	-0.0293113
725.769		SM(16 : 0) [M+Na]+	Tata et al, 2013	725.5	-0.26947	-0.0371427
731.889		SM (18:0) + H] +	Ferreira et al, 2010	731.5	-0.388977	-0.0531753
734.839	C40H81NO8P	PC(32 : 0) + H]+	Tata et al, 2013	734.569	-0.26965	-0.0367086
741.763	C39H79N2O6PK	SM (d18:1/16:0) [M+K]+	Rocha et al, 2014	741.501	-0.262423	-0.0353907
754.758	C40H78NO8PNa	PC (32:1) [M+Na]+	Ferreira et al, 2010	754.536	-0.222235	-0.0294532
756.684	C40H80NO8PNa	PC (32:0) [M+Na]+	Ferreira et al, 2010	756.551	-0.132621	-0.0175297
760.804	C42H83NO8P	PC(34 : 1) [M+H]+	Tata et al, 2013	760.585	-0.219221	-0.0288227
780.723	C42H80NO8P	PC (34:2) [M+Na]+	Ferreira et al, 2009	780.551	-0.171867	-0.0220186
780.723	C44H79NO8P	PC (36:5) [M+H]+	Ferreira et al, 2010	780.554	-0.169467	-0.0217111
782.747	C42H82NO8PNa	PC (16:0/18:1) [M+Na]+	Rocha et al, 2014	782.567	-0.179887	-0.0229868
782.747	C44H81NO8P	PC(36 : 4) [M+H]+	Tata et al, 2013	782.569	-0.177487	-0.0226801
782.747	C42h82NO8PNa	PC(34 : 1) [M+Na]+	Tata et al, 2013	782.567	-0.179887	-0.0229868
784.746	C42H84NO8PNa	PC(34 : 0) [M+Na]+	Tata et al, 2013	784.583	-0.163394	-0.0208256
786.892	C44H85NO8P	PC(36 : 2) [M+H]+	Tata et al, 2013	786.601	-0.290841	-0.0369744
788.891	C44H87NO8P	PC(36 : 1) [M+H]+	Tata et al, 2013	788.616	-0.274347	-0.0347884
800.715	C42H84NO8PK	PC (34:0) [M+K]+	Rocha et al, 2014	800.557	-0.158732	-0.0198277
806.713	C46H81NO8P	PC(38 : 6) [M+H]+	Tata et al, 2013	806.569	-0.143552	-0.0177978
806.713	C44H82NO8PNa	PC(36 : 3) [M+Na]+	Tata et al, 2013	806.567	-0.145952	-0.0180954
808.761	C46H83NO8P	PC(38 : 5) [M+H]+	Tata et al, 2013	808.585	-0.175825	-0.0217448
808.761	C44H84NO8PNa	PC(36 : 2) [M+Na]+	Tata et al, 2013	808.583	-0.178225	-0.0220417
810.785	C46H85NO8P	PC(38 : 4) [M+H]+	Tata et al, 2013	810.601	-0.183846	-0.0226802
810.785	C44H86NO8PNa	PC(36 : 1) [M+Na]+	Tata et al, 2013	810.598	-0.186246	-0.0229763
824.706	C44H84NO8PK	PC (36:2) [M+K]+	Rocha et al, 2014	824.557	-0.149211	-0.0180959
m/z Neg	Predicted molecular formula	Attribution	Reference	Exact mass	Delta theo-obs Da	mass accuracy error %
539.284	C34H67O4	FA dimer [M-H]-	Pirro et al, 2014	539.504	0.21972	0.0407264
778.366	C40H76NO11S	ST (d18:1/16:0) [M-H]-	Rocha et al, 2014	778.514	0.148533	0.0190791
794.369	C45H81NO8P	PE(18:4(6Z,9Z,12Z,15Z)/22:0) [M-H]-	Rocha et al, 2014	794.571	0.201909	0.025411
810.417	C44H77NO10P	PS 38:4 [M-H]-	Ferreira et al, 2012	810.529	0.112291	0.013854
835.424	C43H80O13P	PI (34:1) [M-H]-	Pirro et al, 2014	835.534	0.110433	0.013217
861.456	C45H82O13P	PI (36:2) [M-H]-	Ferreira et al, 2012	861.55	0.0934181	0.010843
863.485	C45H84O13P	PI(36 : 1) [M-H]-	Tata et al, 2013 ; Gonzalez-Serrano et al, 2013	863.566	0.0801484	0.00928111
883.454	C47H80O13P	PI(18:4(6Z,9Z,12Z,15Z)/20:1(11Z)) [M-H]-	Rocha et al, 2014 ; Gonzalez-Serrano et al, 2013	883.534	0.0797933	0.00903115
885.46	C47H82O13P	PI (38:4) [M-H]-	Pirro et al, 2014 ; Tata et al, 2013	885.55	0.0894508	0.0101012
887.466	C47H84O13P	PI (38:3) [M-H]-	Pirro et al, 2014 ; Tata et al, 2013	887.566	0.0990693	0.0111619
